# Supplementary material for: Discovery of ACE Inhibitory Peptides Derived from Green Coffee Using In Silico and In Vitro Methods
Source: MDPI journal article supplement (doi:10.3390/foods12183480), 2023-09-19
Supplement: s1 [file s1]

---

**Supplementary Materials for**

**Discovery of ACE Inhibitory Peptides Derived from**

**Green Coffee Using *in silico* and *in vitro* Methods**

Hao-Peng Dai<sup>1,2</sup>, Min He<sup>1,2</sup>, Gui-Lin Hu<sup>1,2</sup>, Zhong-Rong Li<sup>1</sup>, Abdulbaset Al-  
Romaina<sup>1,2</sup>, Zhou-Wei Wu<sup>1,2</sup>, Ming-Hua Qiu<sup>\* 1,2</sup>

<sup>1</sup> State Key Laboratory of Phytochemistry and Plant Resources in West China, Kunming  
Institute of Botany, Chinese Academy of Sciences, Kunming 650201, People's  
Republic of China

<sup>2</sup> University of Chinese Academy of Sciences, Beijing 100049, People's Republic of  
China

\* Corresponding author:

Telephone: +86-0781-65223327. Fax: +86-0871-65223325.

E-mail: mhchiu@mail.kib.ac.cn

Table S1 Peptide sequence, retention time (RT), length, molecular mass, charge and score of the peptides identified in the alcalase hydrolysates using nanoLC-MS/MS.

| No. | Peptide sequence | RT (min) | length | Mass (Da)   | charge | score       |
|-----|------------------|----------|--------|-------------|--------|-------------|
| 1.  | VVINPGNPTGQ      | 8.4084   | 11     | 1094.570861 | 2      | 186.4107611 |
| 2.  | GLPSGGAPSGY      | 8.4838   | 11     | 961.452821  | 2      | 185.0500457 |
| 3.  | NLGSIPTQ         | 9.0844   | 8      | 828.4363092 | 2      | 125.8140196 |
| 4.  | GLPASPGAAVGQ     | 9.1765   | 12     | 1023.53823  | 2      | 128.3831953 |
| 5.  | KNPNIPDPNTLM     | 9.3902   | 12     | 1368.681202 | 2      | 102.0614523 |
| 6.  | FEDNAGVIVNPK     | 9.7198   | 12     | 1301.665422 | 2      | 157.6630823 |
| 7.  | SENIGLPQ         | 10.83    | 8      | 856.4290199 | 2      | 189.5286939 |
| 8.  | TVDKRLL          | 12.363   | 7      | 843.5099303 | 2      | 102.9798471 |
| 9.  | GESFWGGQ         | 14.831   | 8      | 866.3576558 | 2      | 152.389641  |
| 10. | ALDPGLTY         | 14.954   | 8      | 848.4254938 | 2      | 122.1542868 |
| 11. | RVDSIPIL         | 15.156   | 8      | 911.5414324 | 2      | 100.0663334 |
| 12. | TNDNAMINPL       | 18.482   | 10     | 1101.512101 | 2      | 166.5163046 |
| 13. | ILMIGTQ          | 19.225   | 7      | 774.42865   | 2      | 117.561596  |

---

| No. | Peptide sequence | RT (min) | length | Mass (Da)   | charge | score       |
|-----|------------------|----------|--------|-------------|--------|-------------|
| 14. | LILGPDSPAVQ      | 19.243   | 11     | 1108.613483 | 2      | 93.26691455 |
| 15. | GQLIIVPQ         | 21.175   | 8      | 866.5232251 | 2      | 119.3001685 |
| 16. | SDVGLERQ         | 23.314   | 8      | 902.4490947 | 2      | 103.8329972 |
| 17. | VIEGDLL          | 24.948   | 7      | 757.4245332 | 1      | 97.64023512 |
| 18. | METSNSVPSIL      | 25.752   | 11     | 1192.557553 | 2      | 61.96230632 |
| 19. | ALATPLL          | 26.365   | 7      | 697.4379556 | 1      | 96.33678951 |
| 20. | IPLDLNY          | 27.34    | 7      | 846.4484963 | 1      | 71.35928969 |
| 21. | IIPNEVY          | 27.745   | 7      | 846.4484963 | 1      | 67.03480014 |
| 22. | MSQAGVFDVGY      | 29.401   | 11     | 1214.533312 | 2      | 55.53053424 |
| 23. | AGPGGWNDPDML     | 31.269   | 12     | 1228.52441  | 2      | 103.8329972 |
| 24. | GGKADVL          | 32.044   | 7      | 658.3662592 | 1      | 66.99353222 |
| 25. | STSATVVGMAVSQ    | 32.974   | 13     | 1252.596803 | 2      | 57.59840786 |
| 26. | VGAGNIPPYSPM     | 35.197   | 12     | 1217.583589 | 2      | 59.24507599 |
| 27. | DIIEFIQ          | 36.02    | 7      | 876.4603733 | 1      | 69.99846331 |
| 28. | DAKMAGM          | 36.844   | 7      | 754.3000558 | 2      | 56.51017139 |

---

---

| No. | Peptide sequence | RT (min) | length | Mass (Da)   | charge | score       |
|-----|------------------|----------|--------|-------------|--------|-------------|
| 29. | KNPNIPDPNTL      | 38.286   | 11     | 1221.634336 | 2      | 105.0319149 |
| 30. | VADPDKLPTIPGQ    | 38.293   | 13     | 1349.722628 | 2      | 125.9702909 |
| 31. | VASGNVL          | 38.575   | 7      | 658.3658152 | 1      | 98.03023713 |
| 32. | TNEILIGK         | 39.776   | 8      | 886.5099528 | 2      | 114.4976386 |
| 33. | ALRALPE          | 40.287   | 7      | 768.4482693 | 1      | 111.2783061 |
| 34. | SALRAIPE         | 41.283   | 8      | 855.4807962 | 2      | 101.5418696 |
| 35. | ADLSRIDL         | 41.69    | 8      | 901.4867068 | 2      | 125.4976377 |
| 36. | ADSLDLRL         | 42.098   | 8      | 901.4867068 | 2      | 107.4293946 |
| 37. | GDAPRVL          | 42.131   | 7      | 726.4051323 | 2      | 98.4148342  |
| 38. | APIAVGDVIPDGTL   | 42.156   | 14     | 1336.723736 | 2      | 120.8684288 |
| 39. | SPVAPLAPVTL      | 42.264   | 11     | 1063.629482 | 2      | 155.8763914 |
| 40. | AATLPLM          | 44.351   | 7      | 715.3962087 | 1      | 61.3249463  |
| 41. | ILLPGFTQ         | 45.431   | 8      | 887.5116097 | 2      | 187.6333307 |
| 42. | IPAGMLL          | 45.697   | 7      | 713.415722  | 1      | 58.16054904 |
| 43. | AFNVDLK          | 46.161   | 7      | 805.4360244 | 2      | 129.3622389 |

---

---

| No. | Peptide sequence | RT (min) | length | Mass (Da)   | charge | score       |
|-----|------------------|----------|--------|-------------|--------|-------------|
| 44. | SAFRAIPE         | 46.285   | 8      | 889.4672821 | 2      | 124.080105  |
| 45. | GYIPGIY          | 46.852   | 8      | 894.4857466 | 2      | 100.9062997 |
| 46. | EGDGGVGTIKL      | 48.117   | 11     | 1044.542237 | 2      | 150.6187803 |
| 47. | IQIIFPE          | 48.639   | 7      | 858.4837469 | 2      | 120.8974524 |
| 48. | GIESVPAALIGL     | 49.008   | 12     | 1138.657976 | 2      | 138.8255169 |
| 49. | APILDEVAVSL      | 49.664   | 11     | 1125.621915 | 2      | 113.4992147 |
| 50. | AKDPVRVL         | 50.347   | 8      | 938.5562757 | 2      | 105.1022565 |
| 51. | RAIPEEVL         | 51.483   | 8      | 925.5223414 | 2      | 134.6632081 |
| 52. | SAERGFLY         | 52.378   | 8      | 941.4648164 | 2      | 133.5998691 |
| 53. | GVKSVEIL         | 52.454   | 8      | 843.5052991 | 2      | 116.5422743 |
| 54. | AITPPVMLPPL      | 52.876   | 11     | 1147.664709 | 2      | 94.66240868 |
| 55. | VGHTDTARMLL      | 58.578   | 11     | 1228.628283 | 2      | 63.56507644 |

---

Table S2 Peptide sequence, retention time (RT), length, molecular mass, charge and score of the peptides identified in the thermolysin hydrolysates using nanoLC-MS/MS.

| No. | Peptide sequence | RT (min) | length | Mass (Da)   | charge | score       |
|-----|------------------|----------|--------|-------------|--------|-------------|
| 1.  | LLERGPTPEP       | 6.6184   | 10     | 1107.581739 | 2      | 98.2328978  |
| 2.  | AVNHPNFPST       | 6.976    | 10     | 1082.504788 | 2      | 117.8851479 |
| 3.  | FWDSNNPE         | 13.303   | 8      | 1007.39407  | 2      | 140.981477  |
| 4.  | FVDPDGWKT        | 13.345   | 9      | 1063.493388 | 2      | 141.5204132 |
| 5.  | FLPEYSEQ         | 15.048   | 8      | 1011.447063 | 2      | 128.5660771 |
| 6.  | VKNPNPIPIP       | 18.395   | 10     | 1087.629915 | 2      | 104.3656055 |
| 7.  | LFPSPSPPPP       | 18.679   | 10     | 1034.533909 | 2      | 128.5660771 |
| 8.  | VLETPDGPL        | 19.805   | 9      | 939.482591  | 2      | 148.2059973 |
| 9.  | FDDEVKQGQL       | 22.75    | 10     | 1177.551339 | 1      | 72.64306786 |
| 10. | LITMEPNSL        | 23.211   | 9      | 1016.516528 | 2      | 175.9971999 |
| 11. | IGLPQEAD         | 23.286   | 8      | 841.4118628 | 2      | 128.1929192 |
| 12. | ITPPVMLPP        | 29.942   | 9      | 963.5385208 | 2      | 163.3414491 |
| 13. | IFDPFSPD         | 31.76    | 8      | 936.4138101 | 2      | 163.9965319 |

---

| No. | Peptide sequence | RT (min) | length | Mass (Da)   | charge | score       |
|-----|------------------|----------|--------|-------------|--------|-------------|
| 14. | FRFPSEAG         | 33.532   | 8      | 909.4325214 | 1      | 66.99316637 |
| 15. | FHPPGSDRVD       | 36.265   | 10     | 1125.515555 | 3      | 81.29628213 |
| 16. | IDWKETPEAH       | 36.317   | 10     | 1224.565717 | 2      | 78.93422344 |
| 17. | VVGDPLDPNSHHGPQ  | 37.898   | 15     | 1567.731524 | 3      | 99.75195723 |
| 18. | VMKNRPISEE       | 38.434   | 10     | 1217.608274 | 2      | 107.0075092 |
| 19. | VMDDTSESKPQHPSR  | 39.684   | 15     | 1712.762287 | 4      | 80.5339083  |
| 20. | IDWKETPEAHV      | 41.274   | 11     | 1323.633694 | 3      | 90.05030949 |
| 21. | YSPDGEEGFPGNL    | 58.488   | 13     | 1380.574942 | 2      | 88.13613616 |

---
